# Supplementary material for: Using an e-Health Intervention to Reduce Prolonged Sitting in UK Office Workers: A Randomised Acceptability and Feasibility Study
Source: PubMed Central journal article supplement (PMC7729470; doi:10.3390/ijerph17238942), 2020-12-01
Supplement: ijerph-17-08942-s001.pdf [file ijerph-17-08942-s001.pdf]

**Table S1.** Resting cardiovascular and cerebrovascular measures at the start (PRE) and following (POST) the 8 week Control and Intervention trials (mean  $\pm$  SD).

|                            | Control         |                | Within-Group   | Intervention    |                 | Within-Group   | Between-Group  | Cohen's <i>d</i> |
|----------------------------|-----------------|----------------|----------------|-----------------|-----------------|----------------|----------------|------------------|
|                            | PRE             | POST           | Differences    | PRE             | POST            | Differences    | Differences    |                  |
| <b>Cardiovascular</b>      |                 |                |                |                 |                 |                |                |                  |
| HR (bpm)                   | 62 $\pm$ 10     | 62 $\pm$ 12    | 0 $\pm$ 5      | 58 $\pm$ 11     | 57 $\pm$ 11     | -1 $\pm$ 7     | -1 $\pm$ 8     | 0.17             |
| SBP (mmHg)                 | 125 $\pm$ 14    | 121 $\pm$ 15   | -4 $\pm$ 5     | 120 $\pm$ 11    | 122 $\pm$ 14    | 2 $\pm$ 8      | 6 $\pm$ 11     | 0.93             |
| DBP (mmHg)                 | 77 $\pm$ 9      | 75 $\pm$ 10    | -2 $\pm$ 6     | 73 $\pm$ 10     | 74 $\pm$ 8      | 1 $\pm$ 7      | 3 $\pm$ 9      | 0.48             |
| MAP (mmHg)                 | 93 $\pm$ 10     | 90 $\pm$ 11    | -3 $\pm$ 4     | 88 $\pm$ 9      | 90 $\pm$ 10     | 2 $\pm$ 6      | 5 $\pm$ 6      | 1.02             |
| <b>Cerebrovascular</b>     |                 |                |                |                 |                 |                |                |                  |
| MCAv (cm·s <sup>-1</sup> ) | 70.1 $\pm$ 12.0 | 68.3 $\pm$ 8.4 | -1.8 $\pm$ 7.0 | 67.4 $\pm$ 14.1 | 66.4 $\pm$ 9.1  | -1.0 $\pm$ 8.3 | 0.8 $\pm$ 11.1 | 0.11             |
| PCAv (cm·s <sup>-1</sup> ) | 52.4 $\pm$ 13.3 | 51.3 $\pm$ 9.8 | -1.1 $\pm$ 7.8 | 48.9 $\pm$ 9.1  | 50.2 $\pm$ 10.9 | 1.3 $\pm$ 9.1  | 2.4 $\pm$ 13.7 | 0.30             |
| PETCO <sub>2</sub> (mmHg)  | 38 $\pm$ 4      | 39 $\pm$ 4     | 1 $\pm$ 2      | 36 $\pm$ 5      | 37 $\pm$ 5      | 1 $\pm$ 4      | 0 $\pm$ 5      | 0.00             |

HR—heart rate, SBP—systolic blood pressure; DBP—diastolic blood pressure, MAP—mean arterial pressure, MCAv—middle cerebral artery blood flow velocity, PCAv—posterior middle cerebral artery blood flow velocity, PETCO<sub>2</sub>—pressure of end-tidal carbon dioxide.

**Table S2.** Measures of cerebrovascular function at the start (PRE) and following (POST) the 8 week Control and Intervention trials (mean  $\pm$  SD).

|                                                                             | Control           |                   | Within-Group<br>Differences | Intervention      |                   | Within-Group<br>Differences | Between-Group<br>Differences | Cohen's<br><i>d</i> |
|-----------------------------------------------------------------------------|-------------------|-------------------|-----------------------------|-------------------|-------------------|-----------------------------|------------------------------|---------------------|
|                                                                             | PRE               | POST              |                             | PRE               | POST              |                             |                              |                     |
| <b>MCA CVR</b>                                                              |                   |                   |                             |                   |                   |                             |                              |                     |
| CVR ( $R^2$ )                                                               | 0.89 $\pm$ 0.05   | 0.86 $\pm$ 0.07   | -0.03 $\pm$ 0.08            | 0.84 $\pm$ 0.05   | 0.87 $\pm$ 0.08   | 0.03 $\pm$ 0.09             | 0.06 $\pm$ 0.11              | 0.74                |
| ABS MCA <sub>v</sub> ( $\text{cm}\cdot\text{s}^{-1}\cdot\text{mmHg}^{-1}$ ) | 3.20 $\pm$ 0.89   | 3.23 $\pm$ 1.27   | 0.03 $\pm$ 1.06             | 3.18 $\pm$ 1.09   | 3.35 $\pm$ 0.61   | 0.17 $\pm$ 0.83             | 0.14 $\pm$ 1.11              | 0.16                |
| REL MCA <sub>v</sub> ( $\%\cdot\text{mmHg}^{-1}$ )                          | 4.61 $\pm$ 0.99   | 4.69 $\pm$ 1.64   | 0.08 $\pm$ 1.23             | 4.85 $\pm$ 1.51   | 5.14 $\pm$ 1.01   | 0.29 $\pm$ 1.25             | 0.21 $\pm$ 1.04              | 0.18                |
| <b>CCA CVR</b>                                                              |                   |                   |                             |                   |                   |                             |                              |                     |
| ABS Diameter ( $\text{cm}\cdot\text{mmHg}^{-1}$ )                           | 0.001 $\pm$ 0.001 | 0.001 $\pm$ 0.001 | 0.000 $\pm$ 0.001           | 0.001 $\pm$ 0.001 | 0.001 $\pm$ 0.001 | 0.000 $\pm$ 0.002           | 0.000 $\pm$ 0.002            | 0.00                |
| REL Diameter ( $\%\cdot\text{mmHg}^{-1}$ )                                  | 0.13 $\pm$ 0.13   | 0.13 $\pm$ 0.09   | 0.00 $\pm$ 0.14             | 0.20 $\pm$ 0.18   | 0.13 $\pm$ 0.19   | -0.07 $\pm$ 0.25            | -0.07 $\pm$ 0.28             | 0.37                |
| ABS Blood Flow ( $\text{ml}\cdot\text{min}^{-1}\cdot\text{mmHg}^{-1}$ )     | 0.26 $\pm$ 0.22   | 0.23 $\pm$ 0.21   | -0.03 $\pm$ 0.22            | 0.25 $\pm$ 0.28   | 0.17 $\pm$ 0.27   | -0.08 $\pm$ 0.34            | -0.05 $\pm$ 0.42             | 0.19                |
| REL Blood Flow ( $\%\cdot\text{mmHg}^{-1}$ )                                | 2.00 $\pm$ 1.64   | 1.87 $\pm$ 1.55   | -0.13 $\pm$ 1.78            | 2.06 $\pm$ 2.20   | 1.38 $\pm$ 1.91   | -0.68 $\pm$ 2.48            | -0.55 $\pm$ 3.08             | 0.27                |
| <b>NVC</b>                                                                  |                   |                   |                             |                   |                   |                             |                              |                     |
| ABS Peak PCA <sub>v</sub> ( $\Delta\text{cm}\cdot\text{s}^{-1}$ )           | 9.8 $\pm$ 4.9     | 10.9 $\pm$ 6.3    | 1.1 $\pm$ 3.7               | 6.8 $\pm$ 3.9     | 6.5 $\pm$ 5.4     | -0.3 $\pm$ 7.4              | -1.4 $\pm$ 8.0               | 0.26                |
| REL Peak PCA <sub>v</sub> (%)                                               | 20.6 $\pm$ 12.2   | 22.7 $\pm$ 13.7   | 2.1 $\pm$ 8.0               | 14.7 $\pm$ 8.3    | 15.4 $\pm$ 13.7   | 0.7 $\pm$ 17.7              | -1.4 $\pm$ 18.0              | 0.11                |
| ABS Peak MCA <sub>v</sub> ( $\Delta\text{cm}\cdot\text{s}^{-1}$ )           | 6.2 $\pm$ 1.2     | 6.2 $\pm$ 3.5     | 0.0 $\pm$ 2.7               | 4.8 $\pm$ 0.6     | 5.4 $\pm$ 1.2     | 0.6 $\pm$ 1.3               | 0.6 $\pm$ 3.5                | 0.32                |
| REL Peak MCA <sub>v</sub> (%)                                               | 8.9 $\pm$ 2.0     | 9.2 $\pm$ 4.2     | 0.3 $\pm$ 3.0               | 7.5 $\pm$ 1.7     | 8.3 $\pm$ 2.5     | 0.8 $\pm$ 2.1               | 0.5 $\pm$ 4.6                | 0.22                |
| <b>CA: 5-sec (LF)</b>                                                       |                   |                   |                             |                   |                   |                             |                              |                     |
| Phase (degrees)                                                             | 24.33 $\pm$ 5.30  | 17.87 $\pm$ 8.20  | -6.46 $\pm$ 6.45            | 24.33 $\pm$ 19.96 | 24.07 $\pm$ 6.80  | -0.26 $\pm$ 16.67           | 6.19 $\pm$ 16.67             | 0.53                |
| Gain ( $\text{cm}\cdot\text{s}^{-1}\cdot\text{mmHg}^{-1}$ )                 | 0.87 $\pm$ 0.17   | 0.83 $\pm$ 0.12   | -0.04 $\pm$ 0.12            | 0.81 $\pm$ 0.23   | 0.98 $\pm$ 0.25   | 0.17 $\pm$ 0.22             | 0.21 $\pm$ 0.33              | 1.25                |
| Gain <sub>n</sub> ( $\%\cdot\text{mmHg}^{-1}$ )                             | 1.38 $\pm$ 0.25   | 1.36 $\pm$ 0.22   | -0.02 $\pm$ 0.18            | 1.30 $\pm$ 0.26   | 1.52 $\pm$ 0.37   | 0.22 $\pm$ 0.35             | 0.24 $\pm$ 0.49              | 0.91                |
| Coherence <sup>#</sup>                                                      | 0.64 $\pm$ 0.11   | 0.61 $\pm$ 0.07   | -                           | 0.69 $\pm$ 0.12   | 0.61 $\pm$ 0.07   | -                           | -                            | -                   |
| <b>CA: 10-sec (VLF)</b>                                                     |                   |                   |                             |                   |                   |                             |                              |                     |
| Phase (degrees)                                                             | 43.72 $\pm$ 15.11 | 37.53 $\pm$ 10.02 | -6.19 $\pm$ 7.75            | 45.33 $\pm$ 18.89 | 46.30 $\pm$ 17.94 | 0.97 $\pm$ 17.11            | 7.16 $\pm$ 14.41             | 0.57                |
| Gain ( $\text{cm}\cdot\text{s}^{-1}\cdot\text{mmHg}^{-1}$ )                 | 0.74 $\pm$ 0.18   | 0.83 $\pm$ 0.22   | 0.09 $\pm$ 0.11             | 0.72 $\pm$ 0.25   | 0.80 $\pm$ 0.21   | 0.08 $\pm$ 0.16             | -0.01 $\pm$ 0.22             | 0.08                |
| Gain <sub>n</sub> ( $\%\cdot\text{mmHg}^{-1}$ )                             | 1.20 $\pm$ 0.30   | 1.28 $\pm$ 0.29   | 0.08 $\pm$ 0.19             | 1.20 $\pm$ 0.28   | 1.29 $\pm$ 0.29   | 0.09 $\pm$ 0.15             | 0.01 $\pm$ 0.27              | 0.06                |
| Coherence <sup>#</sup>                                                      | 0.83 $\pm$ 0.15   | 0.86 $\pm$ 0.08   | -                           | 0.88 $\pm$ 0.10   | 0.89 $\pm$ 0.07   | -                           | -                            | -                   |

<sup>#</sup>Coherence values were used to accept the validity of gain and phase estimates and not compared.

MCA<sub>v</sub>—middle cerebral artery blood flow velocity; CVR—cerebrovascular carbon dioxide reactivity; ABS—absolute; REL—relative; CCA—common carotid artery; NVC—neurovascular coupling; PCA<sub>v</sub>—posterior cerebral artery blood flow velocity; CA—cerebral autoregulation; LF—low frequency, VLF—very low frequency; Gain<sub>n</sub>—normalised gain.

**Table S3.** Measures of mood and work productivity at the start (PRE) and following (POST) the 8 week Control and Intervention trials (mean  $\pm$  SD).

|                         | Control        |                | Within-Group   | Intervention   |                | Within-Group   | Between-Group  | Cohen's <i>d</i> |
|-------------------------|----------------|----------------|----------------|----------------|----------------|----------------|----------------|------------------|
|                         | PRE            | POST           | Differences    | PRE            | POST           | Differences    | Differences    |                  |
| <b>Mood</b>             |                |                |                |                |                |                |                |                  |
| Positive Affect         | 34.9 $\pm$ 7.9 | 35.3 $\pm$ 6.1 | 0.4 $\pm$ 7.0  | 35.5 $\pm$ 6.7 | 35.7 $\pm$ 5.5 | 0.2 $\pm$ 6.3  | -0.2 $\pm$ 9.5 | 0.04             |
| Negative Affect         | 15.6 $\pm$ 5.2 | 15.1 $\pm$ 3.6 | -0.5 $\pm$ 5.9 | 15.7 $\pm$ 6.5 | 15.6 $\pm$ 8.2 | -0.1 $\pm$ 9.4 | 0.4 $\pm$ 12.0 | 0.05             |
| <b>HWQ</b>              |                |                |                |                |                |                |                |                  |
| Productivity            | 6.9 $\pm$ 1.9  | 7.1 $\pm$ 1.4  | 0.2 $\pm$ 1.4  | 6.6 $\pm$ 1.9  | 7.5 $\pm$ 1.5  | 0.9 $\pm$ 1.7  | 0.7 $\pm$ 2.1  | 0.47             |
| Concentration/Focus     | 4.5 $\pm$ 2.5  | 3.9 $\pm$ 2.4  | -0.6 $\pm$ 2.5 | 4.6 $\pm$ 2.8  | 3.8 $\pm$ 2.3  | -0.6 $\pm$ 2.2 | 0.0 $\pm$ 4.2  | 0.00             |
| Impatience/Irritability | 3.6 $\pm$ 2.3  | 2.9 $\pm$ 2.0  | -0.7 $\pm$ 2.2 | 3.7 $\pm$ 2.7  | 2.8 $\pm$ 1.5  | -0.9 $\pm$ 2.5 | -0.2 $\pm$ 3.5 | 0.09             |
| Work Satisfaction       | 7.0 $\pm$ 1.8  | 6.7 $\pm$ 2.0  | -0.3 $\pm$ 1.4 | 6.7 $\pm$ 1.8  | 7.3 $\pm$ 1.5  | 0.6 $\pm$ 1.7  | 0.9 $\pm$ 2.2  | 0.60             |
| Stress                  | 5.4 $\pm$ 2.2  | 4.4 $\pm$ 2.2  | -1.0 $\pm$ 2.0 | 5.3 $\pm$ 2.9  | 4.4 $\pm$ 2.2  | -0.9 $\pm$ 3.1 | 0.1 $\pm$ 3.9  | 0.04             |
| Supervisor Relations    | 7.0 $\pm$ 2.4  | 6.9 $\pm$ 2.3  | -0.1 $\pm$ 2.9 | 6.5 $\pm$ 2.6  | 7.0 $\pm$ 2.5  | 0.5 $\pm$ 2.5  | 0.6 $\pm$ 4.1  | 0.23             |
| Non-work Satisfaction   | 8.2 $\pm$ 1.6  | 8.0 $\pm$ 1.5  | -0.2 $\pm$ 1.1 | 7.7 $\pm$ 2.4  | 8.2 $\pm$ 1.8  | 0.5 $\pm$ 1.9  | 0.7 $\pm$ 2.4  | 0.47             |

HWQ—Health and Work Questionnaire.
